# Supplementary material for: Effect of malnutrition on outcomes of hospitalisations for acute pulmonary embolism: a national inpatient database study
Source: HighWire-hosted journal article supplement (doi:10.1136/bmjnph-2023-000705), 2023-10-17
Supplement: bmjnph-2023-000705supp001_data_supplement.pdf [file bmjnph-2023-000705supp001_data_supplement.pdf]

**Supplement Table 1. International Classification of Diseases (ICD-10) code for medical comorbidities.**

|                                      |                                                                |
|--------------------------------------|----------------------------------------------------------------|
| Acute, non-septic pulmonary embolism | I26 (excluding I26.01, I26.90)                                 |
| Malnutrition                         | E40, E41, E42, E43, E44, E45, E46, R64, R63.6                  |
| AKI                                  | N17                                                            |
| Acidosis                             | E87.2                                                          |
| Sepsis                               | A41                                                            |
| Shock                                | R57, R65.21, T81.12                                            |
| DVT                                  | I80.1, I80.2, I80.3, I80.8, I80.9, I82.4, I82.6, I82.89, I82.9 |
| Hypertension                         | I19                                                            |
| Hyperlipidemia                       | I78                                                            |
| Diabetes mellitus                    | E08, E09, E10, E11, E13                                        |
| Heart failure                        | I50                                                            |
| Coronary artery disease              | I25                                                            |
| COPD                                 | J44                                                            |
| CVA                                  | I63, I69.3, Z86.73, G45                                        |
| Atrial fibrillation                  | I48                                                            |
| CKD                                  | N18.1, N18.2, N18.3, N18.4, N18.5, N18.6, N18.9                |
| Alcohol use                          | F10                                                            |
| Tobacco use                          | F17.2, Z72.0, Z87.891                                          |
| GERD                                 | K21                                                            |
| Dementia                             | F03.90, F03.91                                                 |
| Cancer                               | C00-C96                                                        |
| HIV                                  | B20                                                            |

|  |  |
|--|--|
|  |  |
|--|--|

**Supplement Table 2. International Classification of Diseases (ICD-10) code for procedures**

|                                          |                                                                                          |
|------------------------------------------|------------------------------------------------------------------------------------------|
| Thrombolysis, peripheral or central vein | 3E03017, 3E03317, 3E04017, 3E04317                                                       |
| Thrombolysis, central artery             | 3E06017, 3E06317                                                                         |
| Ultrasound-assisted thrombolysis         | 6A75, 6A750, 6A750Z, 6A751, 6A751Z, 6A750Z6, 6A751Z6, 6A750Z7, 6A751Z7, 6A750ZZ, 6A751ZZ |
| Mechanical ventilation                   | 0BH17EZ, 5A1935Z, 5A1945Z, 5A1955Z                                                       |
| Thrombectomy                             | 02CP0ZZ, 02CQ0ZZ, 02CR0ZZ                                                                |
| ECMO                                     | 5A1221Z                                                                                  |
